# Supplementary figures and images for: Cost-effectiveness of home non-invasive ventilation in patients with persistent hypercapnia after an acute exacerbation of COPD in the UK
Source: PubMed Central journal article supplement — Thorax. 2023 Feb 23;78(5):523–5. doi: 10.1136/thorax-2022-219653 (PMC10176417; doi:10.1136/thorax-2022-219653), 2023-02-23

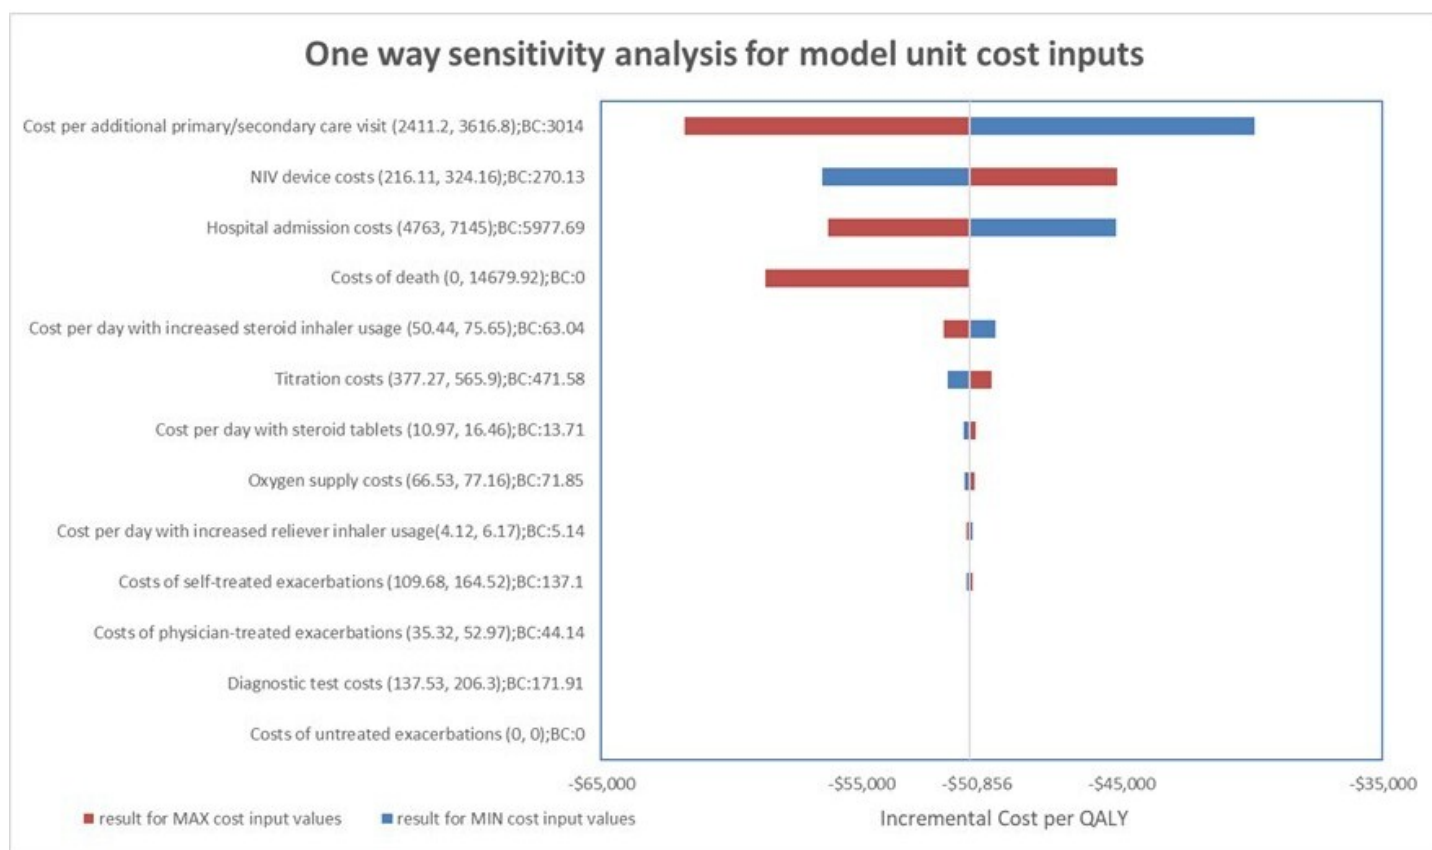

Supplement: thorax-2022-219653supp003.pdf [file thorax-2022-219653supp003.pdf]
